# Supplementary material for: Ex Vivo Rat Transected Spinal Cord Slices as a Model to Assess Lentiviral Vector Delivery of Neurotrophin-3 and Short Hairpin RNA against NG2
Source: MDPI journal article supplement (doi:10.3390/biology9030054), 2020-03-15

## Supplementary Materials

***Ex Vivo* Rat Transected Spinal Cord Slices as a Model to Assess Lentiviral Vector Delivery of Neurotrophin-3 and Short Hairpin RNA against NG2**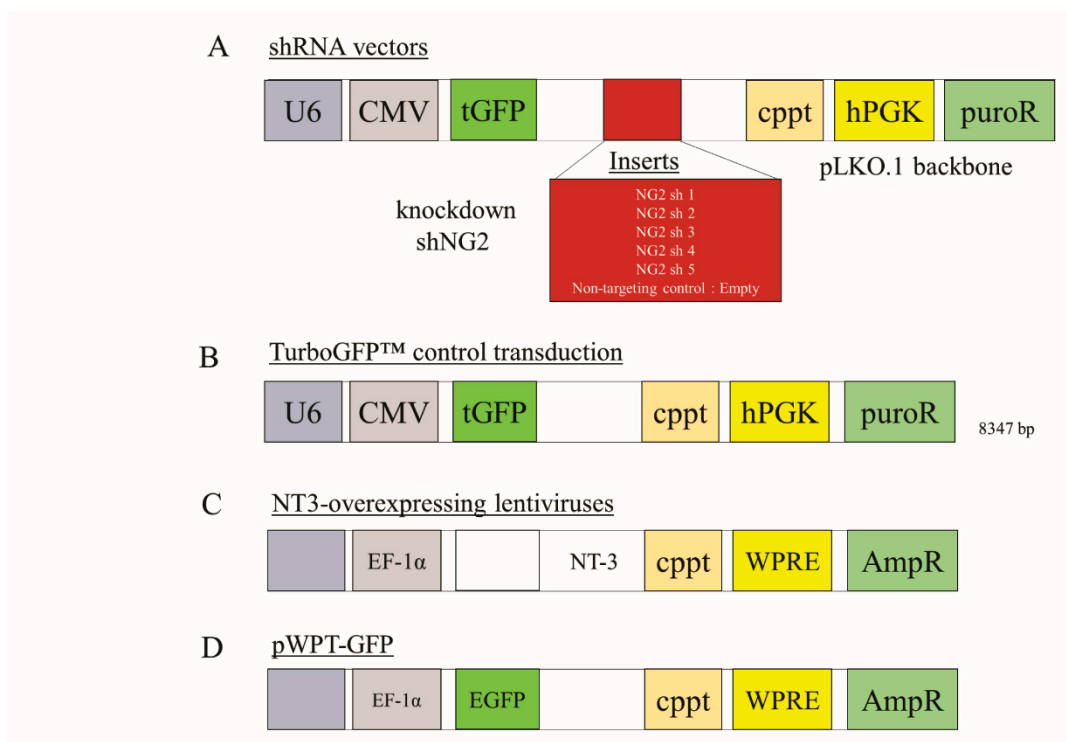

**Figure S1.** Schematic diagram of the shNG2, TurboGFP™ and pWPT-GFP vectors. Puromycin resistance gene (puroR) provides a selectable marker for transduction by the shNG2 vector (A). Non-Targeting Control vector contains a shRNA insert that does not target any known genes from any mammalian species and acts as negative control (A). TurboGFP™ control vector contained a sequence encoding TurboGFP™, under the control of CMV promoter (B). NT-3 expressing vector contained a sequence encoding NT-3 gene under the control of EF-1 $\alpha$  promoter (C). pWPT-GFP control vector containing GFP sequence under the control of EF-1 $\alpha$  promoter (D). Key: U6, U6 promoter; hPGK, human Phosphoglycerate Kinase eukaryotic promoter; CMV, Cytomegalovirus promoter; puroR, puromycin resistance gene; tGFP, turbo green fluorescent protein; AmpR, Ampicilin resistance gene; cppt, central polypurine tract; WPRE, Woodchuck Posttranscriptional Regulatory Element; EF 1- $\alpha$ , human Elongation Factor 1-alpha.

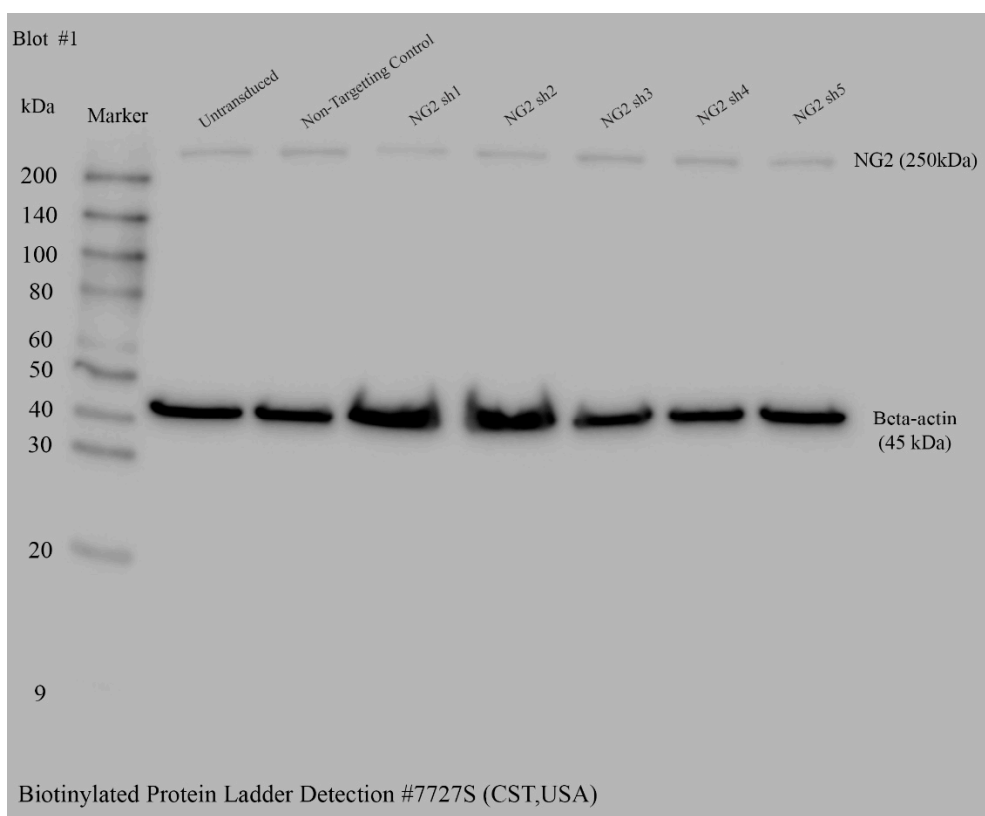

**Figure S2.** Immunoblot of NG2 and Actin showing full blot and molecular weight markers.

**Table S1.** Relative NG2/  $\beta$ -actin intensities from 3 separate immunoblots.

| Repeat # | Relative NG2/ $\beta$ -Actin signal |          |          | Mean     | SD       |
|----------|-------------------------------------|----------|----------|----------|----------|
|          | 1                                   | 2        | 3        |          |          |
| UT       | 0.025415                            | 0.027450 | 0.029557 | 0.027474 | 0.002071 |
| NTC      | 0.024632                            | 0.027911 | 0.027850 | 0.026798 | 0.001876 |
| NG2 sh1  | 0.001267                            | 0.001347 | 0.001284 | 0.001299 | 0.000042 |
| NG2 sh2  | 0.003741                            | 0.002997 | 0.003647 | 0.003462 | 0.000405 |
| NG2 sh3  | 0.020684                            | 0.021470 | 0.022440 | 0.021531 | 0.000880 |
| NG2 sh4  | 0.038260                            | 0.031220 | 0.035337 | 0.034939 | 0.003537 |
| NG2 sh5  | 0.010677                            | 0.015220 | 0.017080 | 0.014326 | 0.003294 |

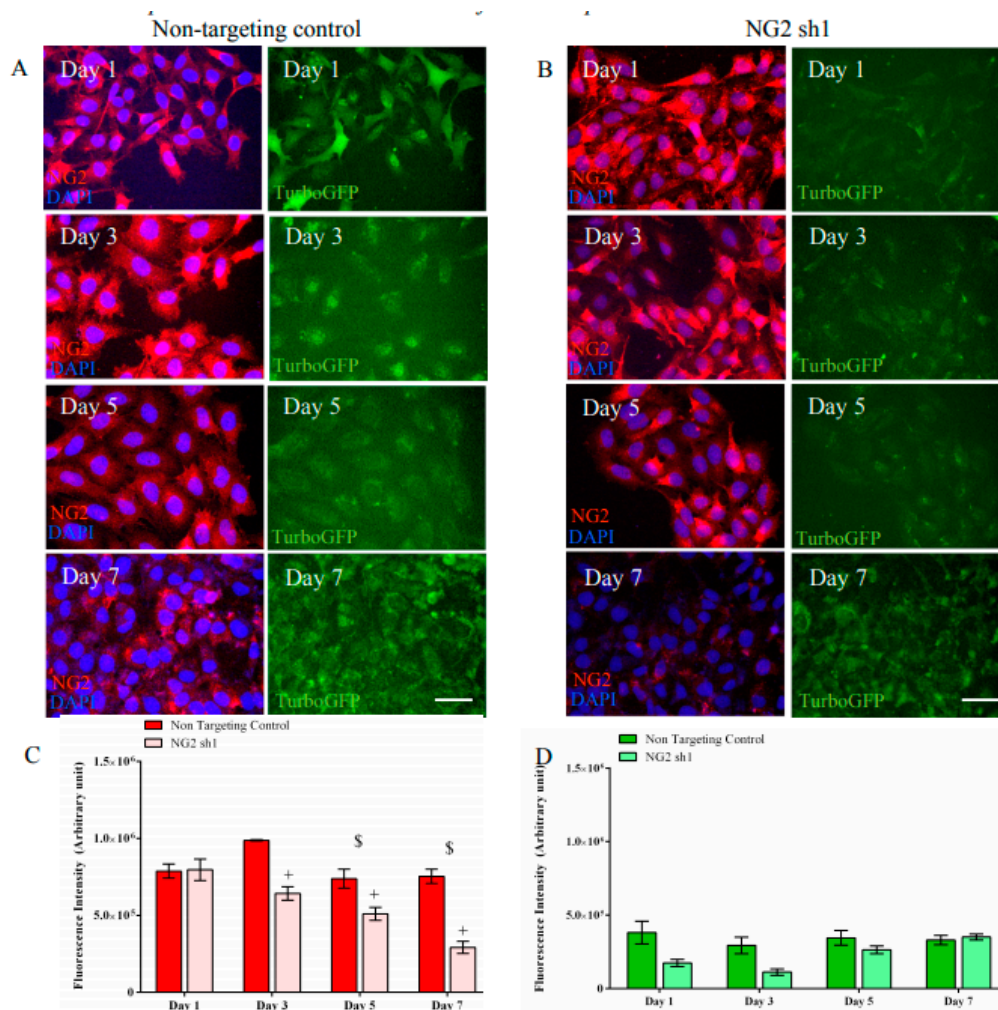

**Figure S3.** NG2 sh1 lentiviral vector significantly reduces NG2 protein in Neu7 cells in vitro. Photomicrographs show representative projected/stacked confocal images of corrected total fluorescence of NG2 protein on days 1, 3, 5 and 7 post transduction with non-targeting control (A) or NG2 sh1 lentiviral vectors (B). Scale bar=50  $\mu$ m. Graphs shows the corrected total cell fluorescence of NG2 protein at each time point (C) and the total cell fluorescence of GFP+ in Neu7 cells (D). Mean  $\pm$  SEM, +  $p \leq 0.001$  significant decrease compared to Non Targeting Control (NTC) group, \$  $p \leq 0.001$  significant compared to days. Analysis was performed using Two-way ANOVA with Tukey's multiple comparisons test. N=3 which relates to 4 independent wells of NTC and of NG2 sh1 treated group per time-point for each technical repeat.

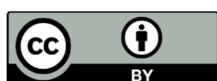

Supplement: s1 [file s1]
